# Supplementary material
Source: publisher figshare collection journal article supplement (https://springernature.figshare.com/ndownloader/files/18095273)
Supplement: Supplementary file 1 [file 18095273]

**Additional file 1** **CRITTERCAM and Fastloc GPS instrument deployment details**. Deployments were in January and February of 2013 and 2014. “night” refers to one hour after sunset through one hour before sunrise, “day” is one hour after sunrise through one hour before sunset. “fps” is frames per second. Fastloc GPS instrument platforms are: a – Sirtrack LTD model F2G134A, or b – Wildlife Computers Inc. model SPLASH 10-AF-297A.

| Animal ID | Year | Video Platform | Video Settings | Video length (h:mm:ss) | Video Resolution (fps) | GPS Platform | Post-Filter Positions |
| --- | --- | --- | --- | --- | --- | --- | --- |
| 406Y | 2013 | Micro-marine | Record when wet. | 8:37:22 | 30 | a | 236 |
| 422Y | 2013 | Generation VI | Record when wet, LED lights on at night. | 6:30:52 | 30 | a | 19 |
| 394Y | 2013 | Micro-marine | Record when wet during the day. | 8:10:35 | 30 | a | 63 |
| 401Y | 2014 | Micro-marine | Delay 12 hours from deployment. Record when wet during the day. | 8:20:33 | 30 | b | 575 |
| 397G | 2014 | Micro-marine | Delay 12 hours from deployment. Record when wet during the day. | 7:55:18 | 30 | b | 678 |
| 37OR | 2014 | Micro-marine | Delay 12 hours from deployment. Record when wet during the day. | 5:18:28 | 60 | b | 861 |
| 16OR | 2014 | Micro-marine | Delay 12 hours from deployment. Record when wet during the day. | 5:03:02 | 60 | b | 1311 |
